# Supplementary material for: A Bivalent Omicron-containing Booster Vaccine Against Covid-19
Source: bioRxiv or medRxiv preprint supplement (doi:10.1101/2022.06.24.22276703), 2022-06-25
Supplement: Supplementary file [file media-2.pdf]

# CONSORT Statement 2006 - Checklist for Non-inferiority and Equivalence Trials

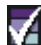

## Items to include when reporting a non-inferiority or equivalence randomized trial

**Please note: This is an open-label phase 2/3 study that evaluates safety and non-inferiority of study vaccination in 2 cohorts of participants. The checklist has been correspondingly completed to indicate compliance with guidelines where applicable. NA=not applicable.**

| PAPER SECTION<br>And topic                    | Item | Descriptor                                                                                                                                                                                                                                                                                                                                                                                        | Reported on<br>Page #                                                                                          |
|-----------------------------------------------|------|---------------------------------------------------------------------------------------------------------------------------------------------------------------------------------------------------------------------------------------------------------------------------------------------------------------------------------------------------------------------------------------------------|----------------------------------------------------------------------------------------------------------------|
| TITLE & ABSTRACT                              | 1    | <u>How participants were allocated to interventions</u> (e.g., "random allocation", "randomized", or "randomly assigned"), specifying that the trial is a non-inferiority or equivalence trial.                                                                                                                                                                                                   | NA: not a randomized trial; participants were allocated to study vaccine as described (pg. 5, & Fig. 1, pg.19) |
| INTRODUCTION<br>Background                    | 2    | <u>Scientific background and explanation of rationale</u> , including the rationale for using a non-inferiority or equivalence design.                                                                                                                                                                                                                                                            | 4; Supplement<br>pg.4-6                                                                                        |
| METHODS<br>Participants                       | 3    | <u>Eligibility criteria for participants</u> (detailing whether participants in the non-inferiority or equivalence trial are similar to those in any trial(s) that established efficacy of the reference treatment) and the <u>settings and locations where the data were collected</u> .                                                                                                         | 5; Supplement,<br>pg. 4-6                                                                                      |
| Interventions                                 | 4    | <u>Precise details of the interventions intended for each group</u> detailing whether the reference treatment in the non-inferiority or equivalence trial is identical (or very similar) to that in any trial(s) that established efficacy, <u>and how and when they were actually administered</u> .                                                                                             | 5; Supplement pg.<br>4                                                                                         |
| Objectives                                    | 5    | <u>Specific objectives and hypotheses</u> , including the hypothesis concerning non-inferiority or equivalence.                                                                                                                                                                                                                                                                                   | 7-9; Supplement,<br>pg. 6-9 and 16-17                                                                          |
| Outcomes                                      | 6    | <u>Clearly defined primary and secondary outcome measures</u> detailing whether the outcomes in the non-inferiority or equivalence trial are identical (or very similar) to those in any trial(s) that established efficacy of the reference treatment and, when applicable, any <u>methods used to enhance the quality of measurements</u> (e.g., multiple observations, training of assessors). | 7-9; Supplement,<br>pg. 6-9                                                                                    |
| Sample size                                   | 7    | <u>How sample size was determined</u> detailing whether it was calculated using a non-inferiority or equivalence criterion and specifying the margin of equivalence with the rationale for its choice. When applicable, <u>explanation of any interim analyses and stopping rules</u> (and whether related to a non-inferiority or equivalence hypothesis).                                       | Supplement, pg. 7                                                                                              |
| Randomization --<br>Sequence generation       | 8    | <u>Method used to generate the random allocation sequence</u> , including details of any restrictions (e.g., blocking, stratification)                                                                                                                                                                                                                                                            | NA: not<br>randomized                                                                                          |
| Randomization --<br>Allocation<br>concealment | 9    | <u>Method used to implement the random allocation sequence</u> (e.g., numbered containers or central telephone), clarifying whether the sequence was concealed until interventions were assigned.                                                                                                                                                                                                 | NA: not<br>randomized                                                                                          |
| Randomization --<br>Implementation            | 10   | <u>Who generated the allocation sequence, who enrolled participants, and who assigned participants to their groups</u> .                                                                                                                                                                                                                                                                          | NA: not<br>randomized                                                                                          |
| Blinding (masking)                            | 11   | <u>Whether or not participants, those administering the interventions, and those assessing the outcomes were blinded to group assignment</u> . If done, <u>how the success of blinding was evaluated</u> .                                                                                                                                                                                        | NA: open-label<br>trial                                                                                        |
| Statistical methods                           | 12   | <u>Statistical methods used to compare groups for primary outcome(s)</u> , specifying whether a one or two-sided confidence interval approach was used. <u>Methods for additional analyses</u> , such as subgroup analyses and adjusted analyses.                                                                                                                                                 | 7-9; Supplement,<br>pg. 6-8                                                                                    |

|                                     |    |                                                                                                                                                                                                                                                                                                                                                             |                                                    |
|-------------------------------------|----|-------------------------------------------------------------------------------------------------------------------------------------------------------------------------------------------------------------------------------------------------------------------------------------------------------------------------------------------------------------|----------------------------------------------------|
| <b>RESULTS</b><br>Participant flow  | 13 | <u>Flow of participants through each stage</u> (a diagram is strongly recommended). Specifically, for each group report the numbers of participants randomly assigned, receiving intended treatment, completing the study protocol, and analyzed for the primary outcome. <u>Describe protocol deviations from study as planned, together with reasons.</u> | 16; Figure 1                                       |
| Recruitment                         | 14 | <u>Dates defining the periods of recruitment and follow-up.</u>                                                                                                                                                                                                                                                                                             | 9-10                                               |
| Baseline data                       | 15 | <u>Baseline demographic and clinical characteristics of each group.</u>                                                                                                                                                                                                                                                                                     | 9 and Table 1, pg. 20                              |
| Numbers analyzed                    | 16 | <u>Number of participants (denominator) in each group included in each analysis and whether the analysis was “intention-to-treat” and/or alternative analyses were conducted.</u> State the results in absolute numbers when feasible (e.g., 10/20, not 50%).                                                                                               | Table 2 pg. 21; Supplement, pg. 12-15 and 22-28    |
| Outcomes and estimation             | 17 | <u>For each primary and secondary outcome, a summary of results for each group, and the estimated effect size and its precision</u> (e.g., 95% confidence interval). <i>For the outcome(s) for which non-inferiority or equivalence is hypothesized, a figure showing confidence intervals and margins of equivalence may be useful.</i>                    | 11-12, Table 2; 21; Supplement, p. 12-15 and 19-28 |
| Ancillary analyses                  | 18 | <u>Address multiplicity by reporting any other analyses performed</u> , including subgroup analyses and adjusted analyses, indicating those pre-specified and those exploratory.                                                                                                                                                                            | 7-9; Supplement, pg. 6-8                           |
| Adverse events                      | 19 | <u>All important adverse events or side effects in each intervention group.</u>                                                                                                                                                                                                                                                                             | 10 and Figure 2 pg.17                              |
| <b>DISCUSSION</b><br>Interpretation | 20 | <u>Interpretation of the results</u> , taking into account the <i>non-inferiority or equivalence hypothesis and any other study hypotheses</i> , sources of potential bias or imprecision and the dangers associated with multiplicity of analyses and outcomes.                                                                                            | 9-12                                               |
| Generalizability                    | 21 | <u>Generalizability (external validity) of the trial findings.</u>                                                                                                                                                                                                                                                                                          | 14-15                                              |
| Overall evidence                    | 22 | <u>General interpretation of the results in the context of current evidence.</u>                                                                                                                                                                                                                                                                            | 13-14                                              |

[www.consort-statement.org](http://www.consort-statement.org)
